# Supplementary material
Source: Springer Nature journal article supplement (https://www.springermedizin.de/resource/supplementary/13012_2013_709_MOESM2_ESM.pdf/9630294)

# KNOWLEDGE TO ACTION PROCESS

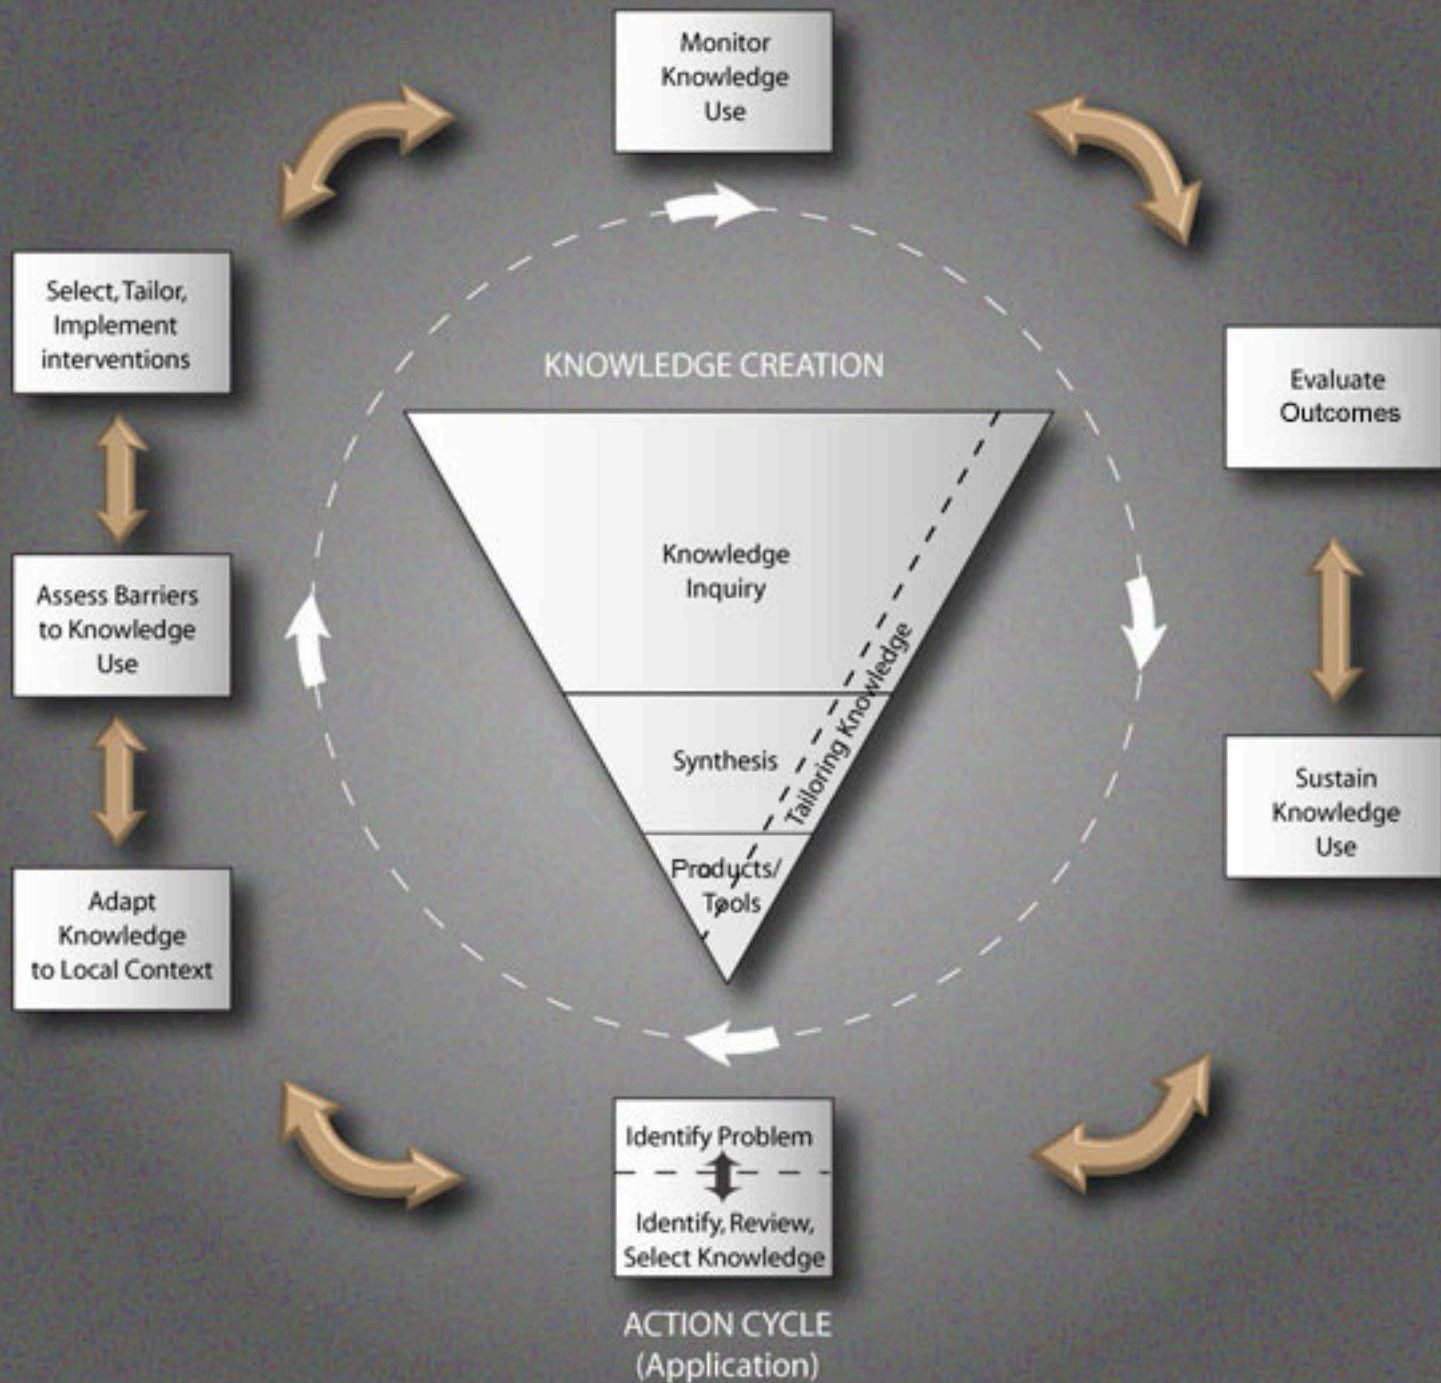

Supplement: MOESM2 [file 9630294]
